# Supplementary material for: Changes in Near-Surface Temperature in Ghana, West Africa and the links with Climatic Factors
Source: Research Square preprint supplement (doi:10.21203/rs.3.rs-1746101/v1), 2022-06-22
Supplement: Supplementary file 1 [file 98cde9f024574824f300a6cb.docx]

Supplementary Material for

**Changes in Near-Surface Temperature in Ghana, West Africa and the links with Climatic Factors**

Collins Oduro1,7, Shuoben Bi2*, Brian Ayugi,3,7, Vedaste Iyakaremye4,7, Hassen Babaousmail5, Peter Asare-Nuamah6, Isaac Sarfo1,7, Daniel Fiifi Tawia Hagan2

1*Research Institute for History of Science and Technology, Nanjing University of
Information Science and Technology, Nanjing 210044 Jiangsu, China.* *E-mail:*[*20205129001@nuist.edu.cn*](mailto:20205129001@nuist.edu.cn)

*2School of Geographical Sciences, Nanjing University of Information Science and
Technology, 210044 Nanjing, Jiangsu, China.* *E-mail: [bishuoben@163.com](mailto:bishuoben@163.com)*

*3Department of Civil Engineering, Seoul National University of Science and Technology, 01811, Republic of Korea*

*4Rwanda Meteorology Agency, P.O.BOX 878, Kigali, Rwanda.*

*E-mail:* [*v.iyakaremye@meteorwanda.gov.rw*](mailto:v.iyakaremye@meteorwanda.gov.rw)

*5Wuxi University, Wuxi 214105, China; E-mail:*[*baw.hassan47@gmail.com*](mailto:baw.hassan47@gmail.com)

*6 School of Sustainable Development,University of Environment and Sustainable Development, Somanya, Ghana e-mail:* [*pasare-nuamah@uesd.edu.gh*](mailto:pasare-nuamah@uesd.edu.gh)

1*Research Institute for History of Science and Technology, Nanjing University of
Information Science and Technology, Nanjing 210044 Jiangsu, China. E-mail:*[*20195129001@nuist.edu.cn*](mailto:prezduro@gmail.com)

*2School of Geographical Sciences, Nanjing University of Information Science and Technology, Nanjing 210044, China. E-mail:* [*dans7messiah@nuist.edu.cn*](mailto:dans7messiah@nuist.edu.cn)

*7Organization of African Academic Doctors (OAAD), Off Kamiti Road P.O. Box 25305-00100, Nairobi, Kenya.*

Corresponding Author (*): [*bishuoben@163.com*](mailto:bishuoben@163.com)

**Contents:**

Figures S1-S4


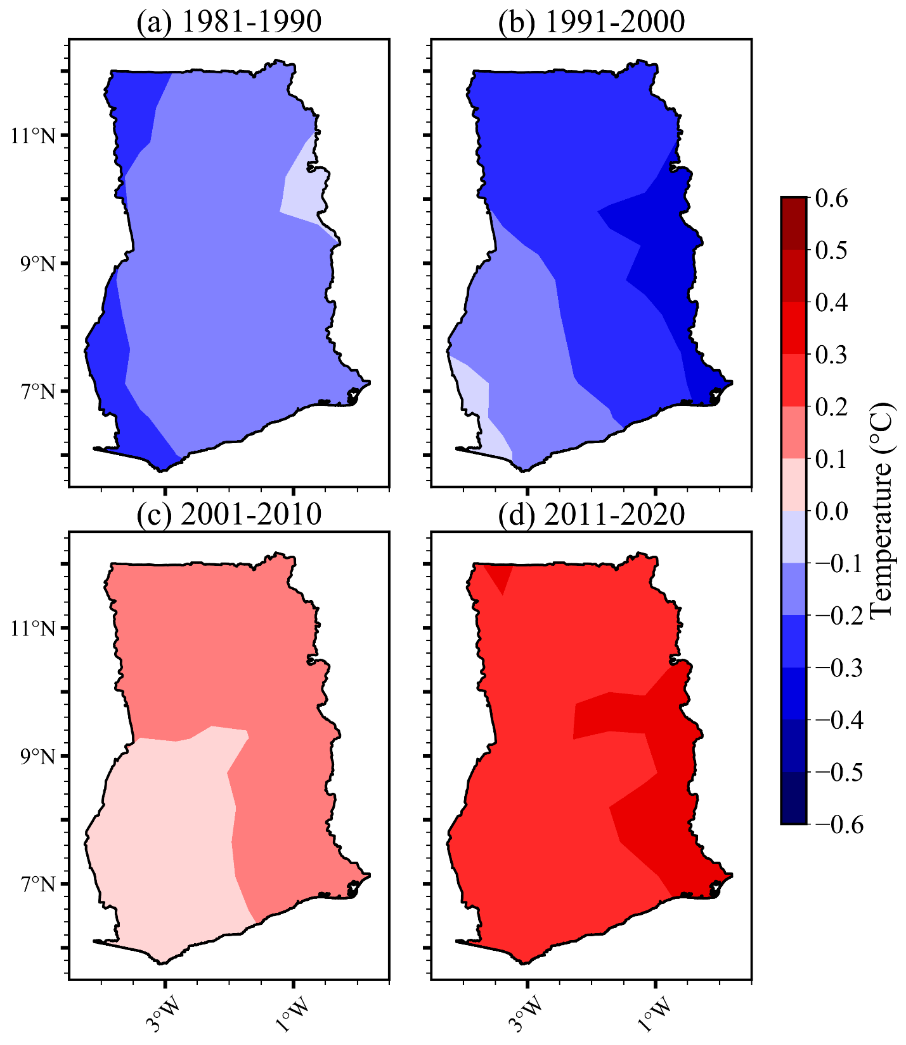


**Figure S1**. Decadal mean anomalies of mean temperature (a–d) from 1981 to 2020. Anomalies are computed with respect to the whole study period (1981–2020) from CRU.


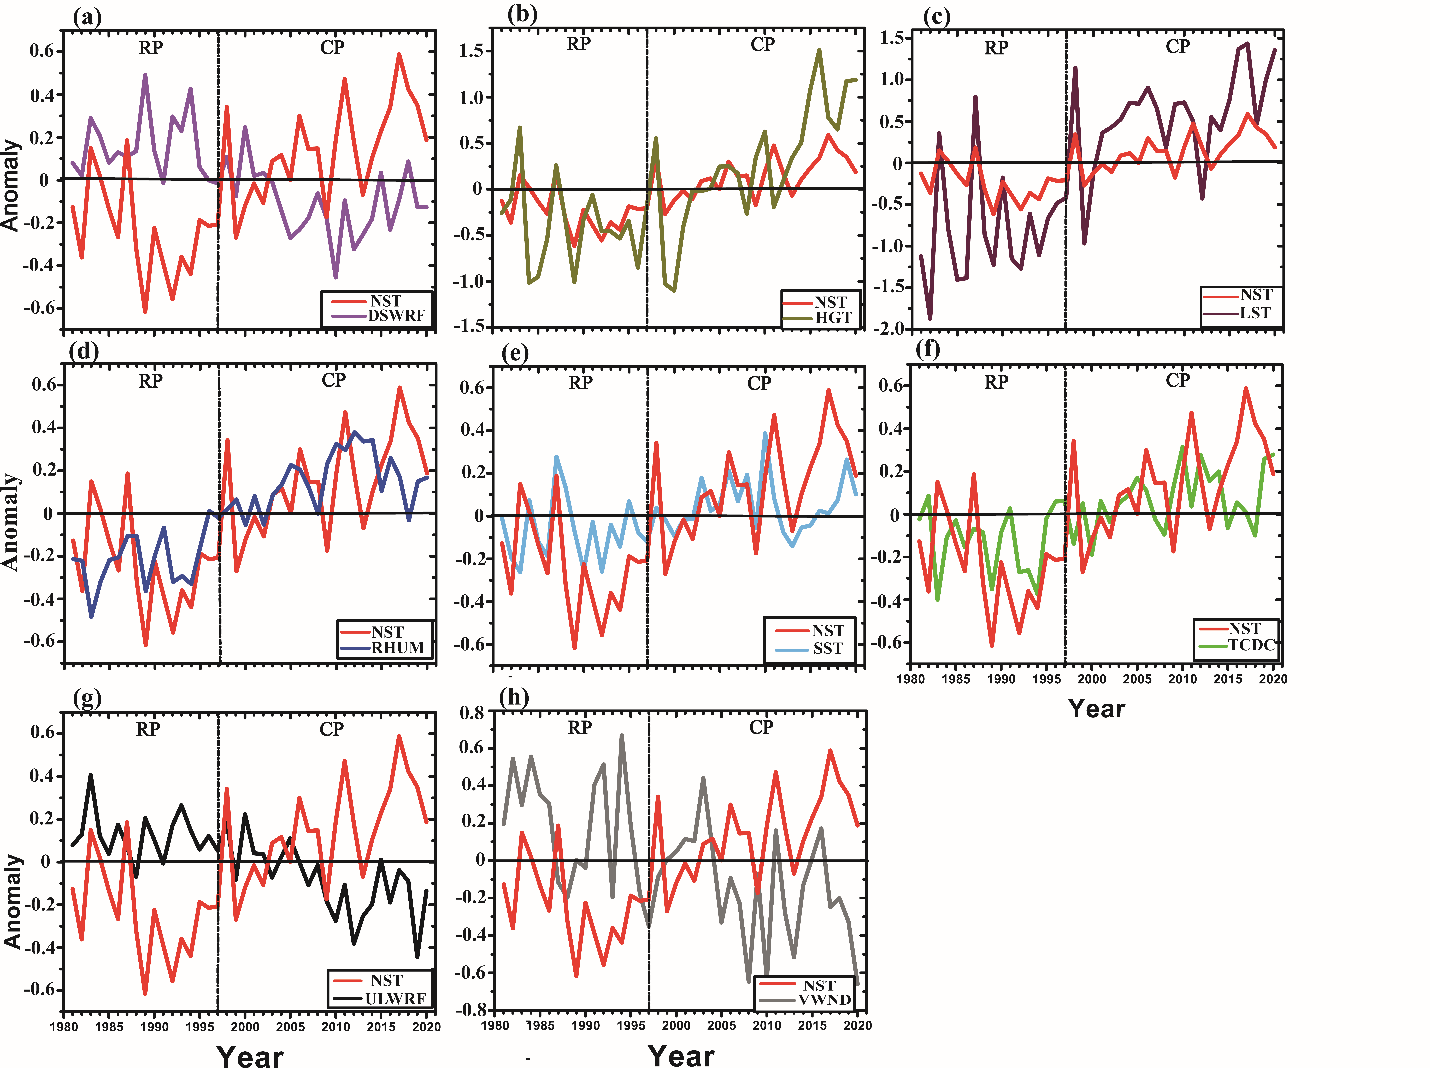


**Figure S2.** Time series of the change annual change between the various atmospheric drivers and mean temperature change of RP and CP


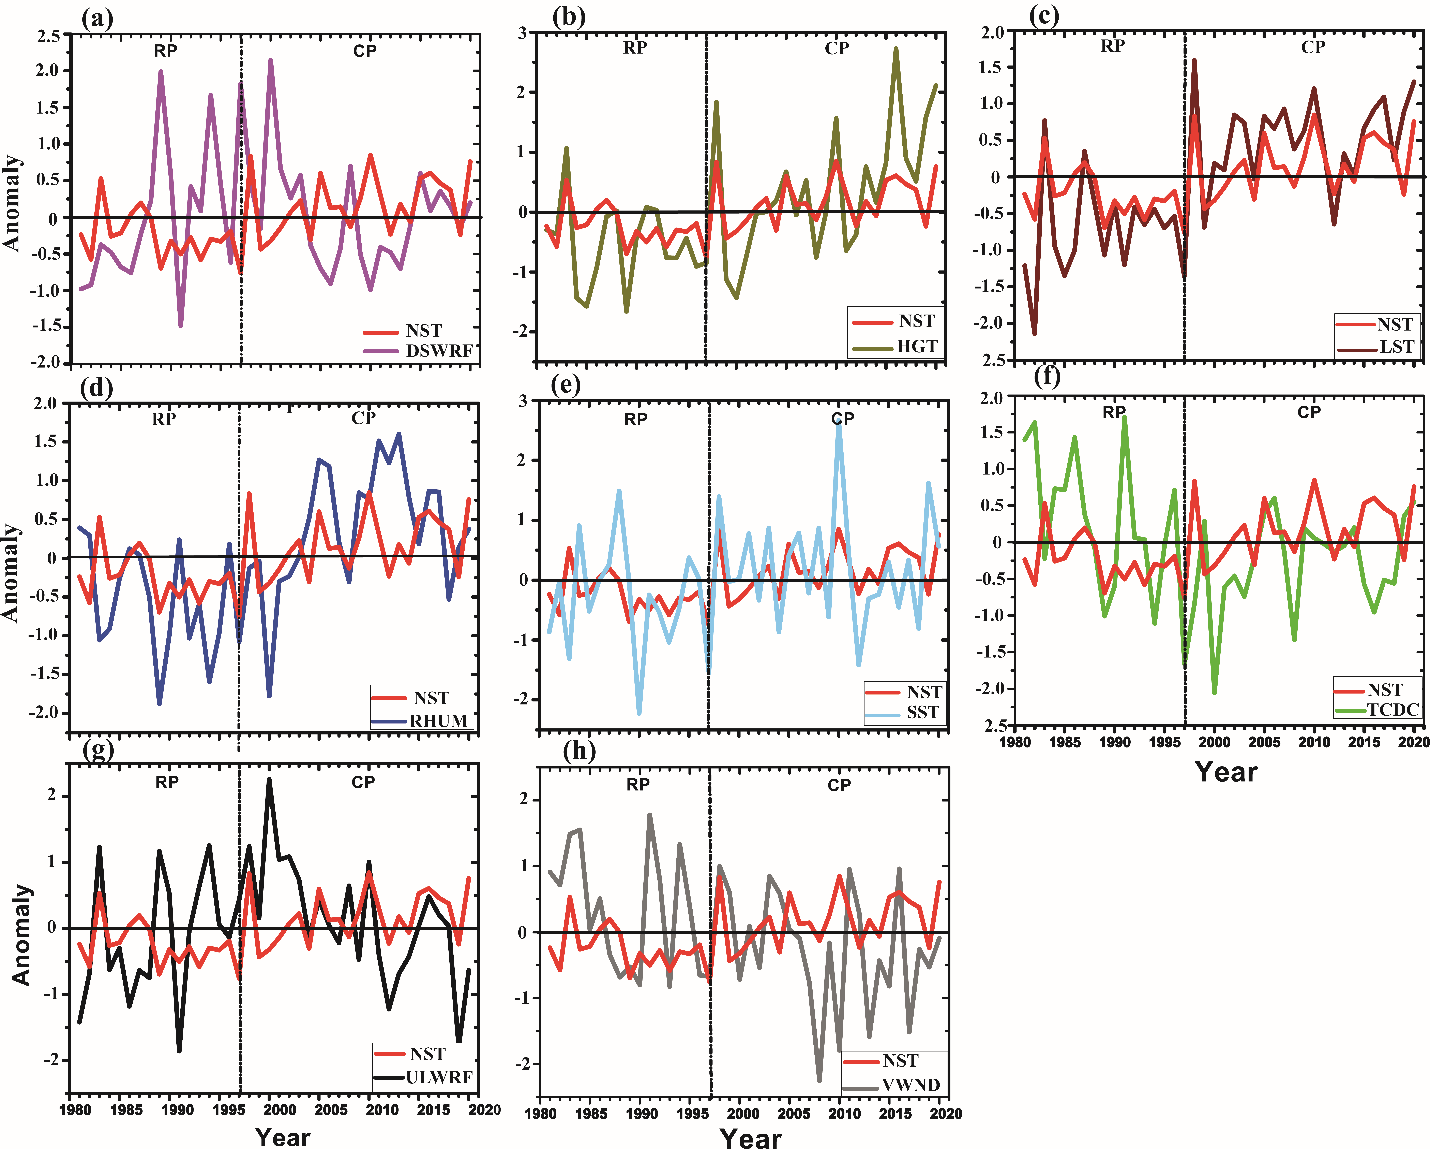
**Figure S3.** Time series of the change FMAM seasonal change between the various atmospheric drivers and mean temperature change of RP and CP


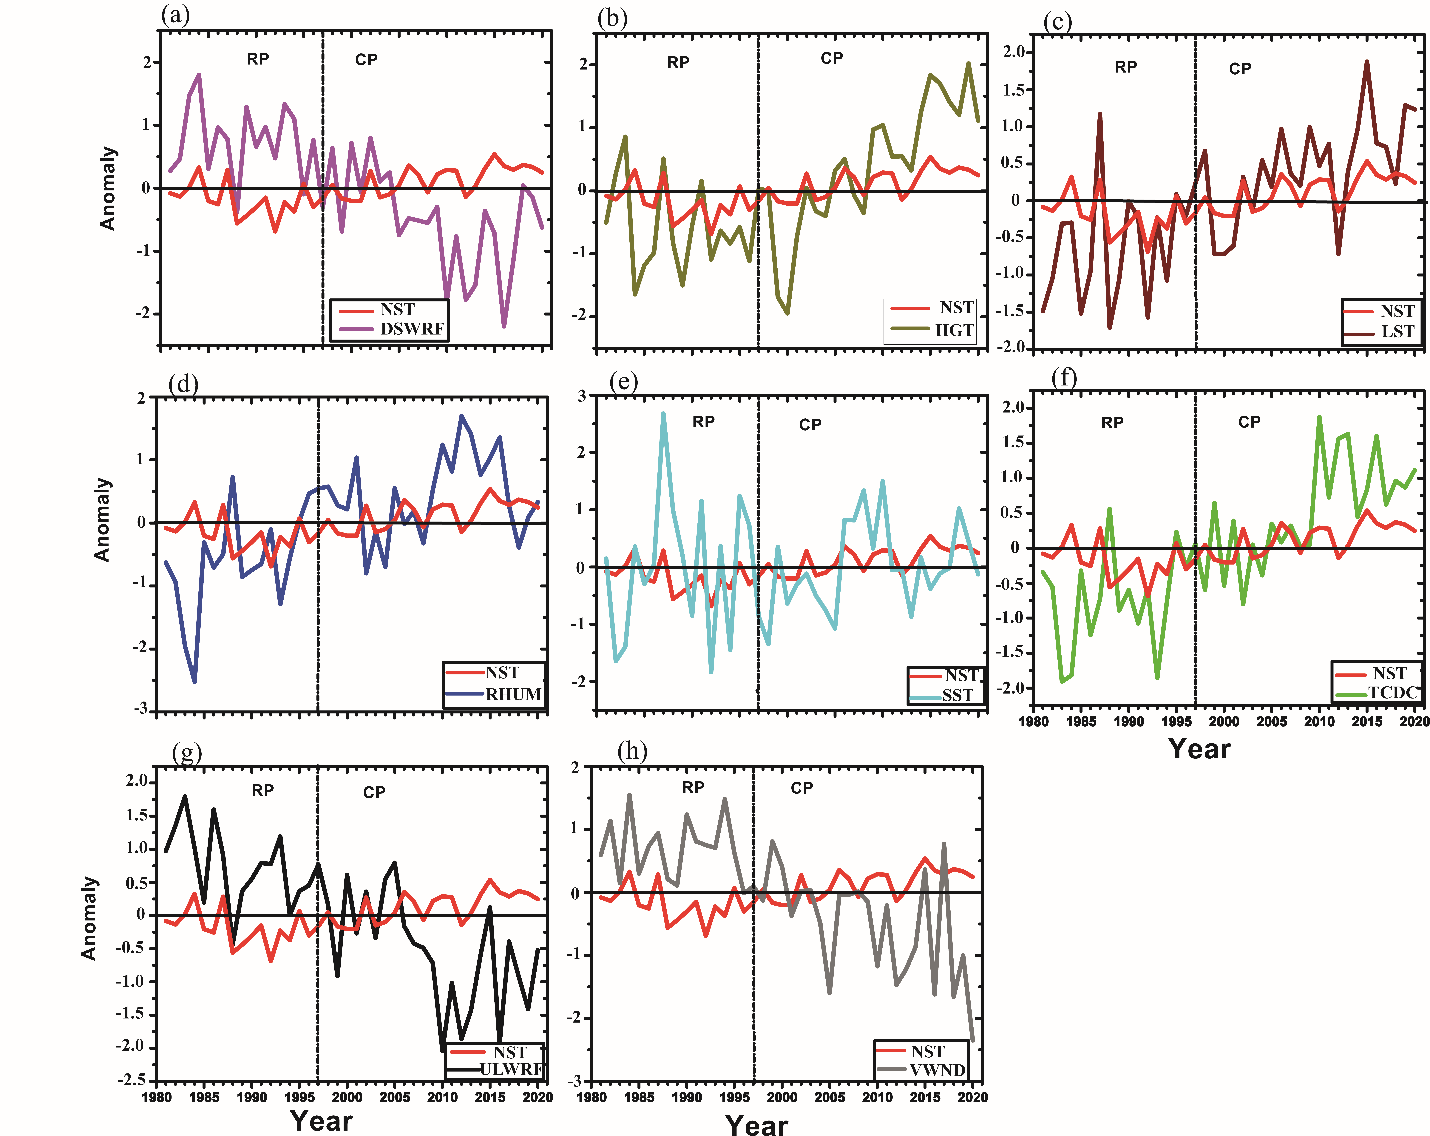
**Figure S4.** Time series of the change JJAS seasonal change between the various atmospheric drivers and mean temperature change of RP and CP
